# Supplementary material
Source: Springer Nature journal article supplement (https://www.springermedizin.de/resource/supplementary/12943_2006_156_MOESM15_ESM.pdf/9553564)
Supplement: MOESM15 [file 9553564]

|                 | <b>ErbB2</b> | <b>ER</b>    | <b>PR</b>    |
|-----------------|--------------|--------------|--------------|
| <b>let7a</b>    | <b>3.768</b> | <b>3.321</b> | <b>2.642</b> |
| <b>let7b</b>    | <b>2.968</b> | <b>2.569</b> | <b>2.322</b> |
| <b>let7c</b>    | <b>3.596</b> |              | <b>2.218</b> |
| <b>let7f</b>    | <b>2.621</b> |              |              |
| <b>let7g</b>    | <b>3.459</b> |              |              |
| <b>let7i</b>    | <b>2.446</b> |              | <b>1.708</b> |
| <b>miR100</b>   | <b>0.963</b> | <b>5.78</b>  | <b>4.883</b> |
| <b>miR103</b>   | <b>2.35</b>  | <b>4.17</b>  | <b>2.76</b>  |
| <b>miR106a</b>  | <b>1.76</b>  | <b>2.53</b>  | <b>1.59</b>  |
| <b>106b</b>     |              |              | <b>2.08</b>  |
| <b>miR107</b>   | <b>1.97</b>  |              |              |
| <b>miR10b</b>   | <b>2.05</b>  |              |              |
| <b>miR125a</b>  | <b>1.66</b>  |              | <b>2.05</b>  |
| <b>miR125b</b>  | <b>3.05</b>  | <b>2.18</b>  | <b>2.07</b>  |
| <b>miR126</b>   | <b>3.79</b>  |              |              |
| <b>miR126*</b>  | <b>3.64</b>  | <b>2.46</b>  |              |
| <b>miR141</b>   | <b>4.99</b>  |              | <b>5.41</b>  |
| <b>miR1425p</b> |              | <b>7.94</b>  | <b>2.55</b>  |
| <b>miR143</b>   | <b>4.32</b>  | <b>3.21</b>  | <b>2.57</b>  |
| <b>miR145</b>   | <b>4.23</b>  | <b>3.24</b>  | <b>2.52</b>  |
| <b>miR148a</b>  |              | <b>2.48</b>  | <b>2.1</b>   |
| <b>miR150</b>   | <b>1.25</b>  |              | <b>1.29</b>  |
| <b>miR154</b>   | <b>1.64</b>  |              |              |
| <b>miR15a</b>   | <b>2.56</b>  | <b>3.39</b>  | <b>2.77</b>  |
| <b>miR16</b>    | <b>3.65</b>  | <b>3.58</b>  | <b>2.72</b>  |
| <b>miR182</b>   |              | <b>0.96</b>  |              |
| <b>miR191</b>   | <b>1.96</b>  | <b>3.17</b>  | <b>3.02</b>  |
| <b>miR195</b>   | <b>2.65</b>  |              |              |
| <b>miR19a</b>   |              |              | <b>1.55</b>  |
| <b>miR19b</b>   | <b>2.29</b>  | <b>2.82</b>  | <b>2.57</b>  |
| <b>miR199a*</b> |              |              | <b>1.87</b>  |
| <b>miR199b</b>  |              | <b>4.34</b>  |              |
| <b>miR200a</b>  |              | <b>5.06</b>  | <b>4.4</b>   |
| <b>miR205</b>   | <b>0.77</b>  | <b>5.37</b>  | <b>5.04</b>  |
| <b>miR21</b>    | <b>1.27</b>  | <b>2.8</b>   | <b>2.87</b>  |
| <b>miR210</b>   |              | <b>1.72</b>  |              |
| <b>miR22</b>    | <b>3.38</b>  | <b>2.67</b>  | <b>2.52</b>  |
| <b>miR221</b>   | <b>3.18</b>  | <b>3.42</b>  |              |
| <b>miR222</b>   | <b>2.91</b>  | <b>3.09</b>  |              |
| <b>miR224</b>   | <b>2.26</b>  | <b>2.36</b>  | <b>2.01</b>  |
| <b>miR24</b>    | <b>2.89</b>  | <b>2.84</b>  | <b>2.36</b>  |
| <b>miR25</b>    |              | <b>2.51</b>  | <b>2.62</b>  |
| <b>miR26a</b>   | <b>4.6</b>   | <b>3.02</b>  | <b>2.79</b>  |
| <b>miR26b</b>   | <b>3.41</b>  | <b>2.78</b>  |              |
| <b>miR27a</b>   | <b>2.98</b>  |              | <b>2.71</b>  |
| <b>miR27b</b>   | <b>1.72</b>  | <b>3.48</b>  | <b>2.68</b>  |
| <b>miR29a</b>   | <b>3.05</b>  | <b>3.51</b>  | <b>2.83</b>  |
| <b>miR29c</b>   |              |              | <b>3.21</b>  |
| <b>miR30a5p</b> |              |              | <b>2.96</b>  |
| <b>miR30b</b>   | <b>1.84</b>  | <b>3.41</b>  | <b>2.71</b>  |
| <b>miR30c</b>   | <b>2.47</b>  | <b>3.02</b>  | <b>2.4</b>   |
| <b>miR30d</b>   |              | <b>2.32</b>  |              |
| <b>miR30e</b>   |              | <b>1.75</b>  |              |
| <b>miR3245p</b> |              | <b>2.86</b>  | <b>2.68</b>  |
| <b>miR330</b>   | <b>4.56</b>  | <b>4.78</b>  | <b>2.83</b>  |
| <b>miR34a</b>   |              |              | <b>1.89</b>  |
| <b>miR34b</b>   |              | <b>3.13</b>  | <b>2.03</b>  |
| <b>miR342</b>   | <b>1.7</b>   | <b>4.86</b>  | <b>2.29</b>  |
| <b>miR92</b>    |              | <b>2.6</b>   | <b>2.53</b>  |
| <b>miR93</b>    |              | <b>2.25</b>  | <b>2.51</b>  |
| <b>miR95</b>    | <b>1.72</b>  | <b>4.36</b>  |              |
| <b>miR99a</b>   | <b>3.64</b>  | <b>2.6</b>   | <b>2.17</b>  |
| <b>miR99b</b>   |              |              | <b>1.65</b>  |
